# Supplementary material
Source: PubMed Central journal article supplement (PMC11404277)
Supplement: NIHPP2024.07.04.602033v2-supplement-3.pdf [file NIHPP2024.07.04.602033v2-supplement-3.pdf]

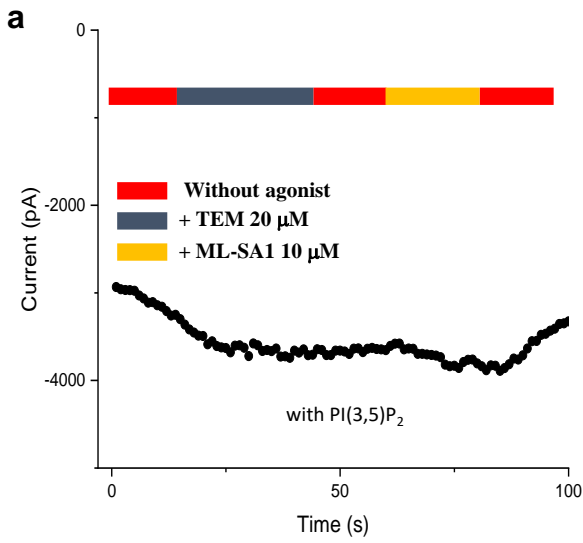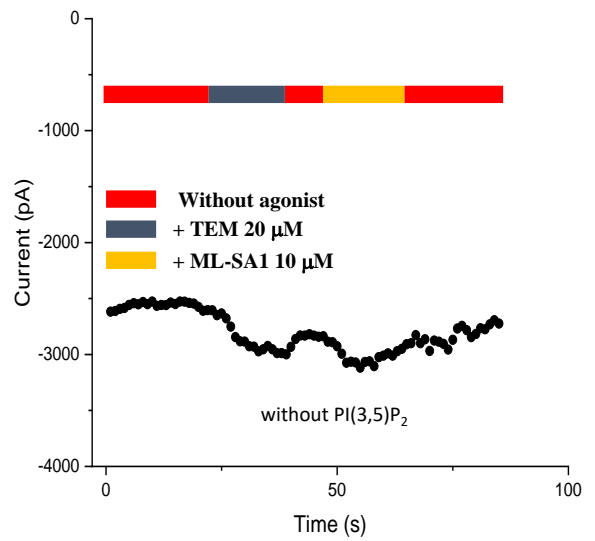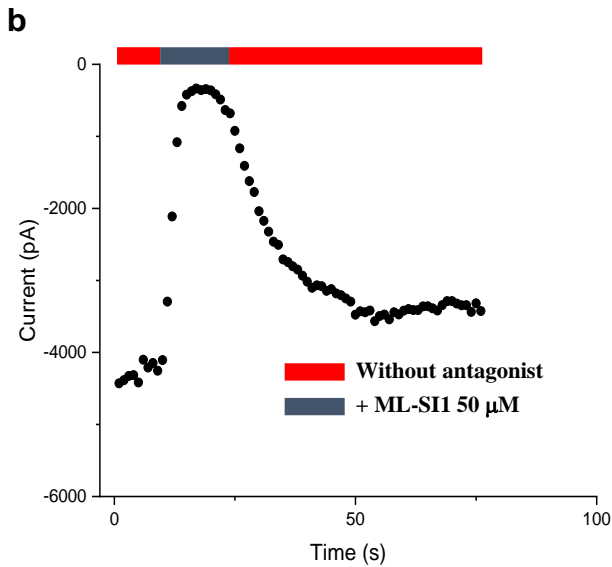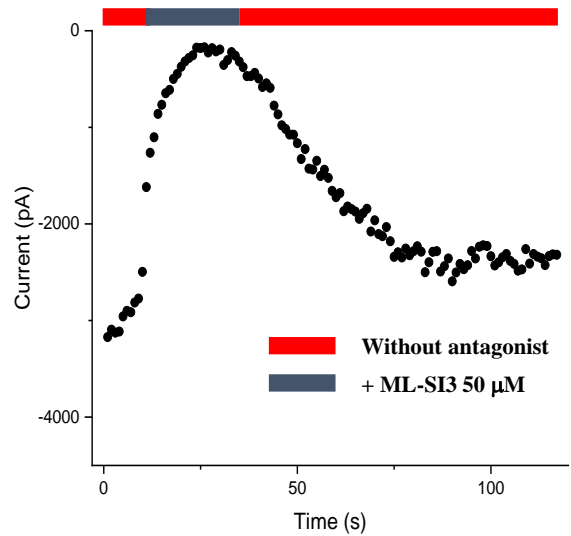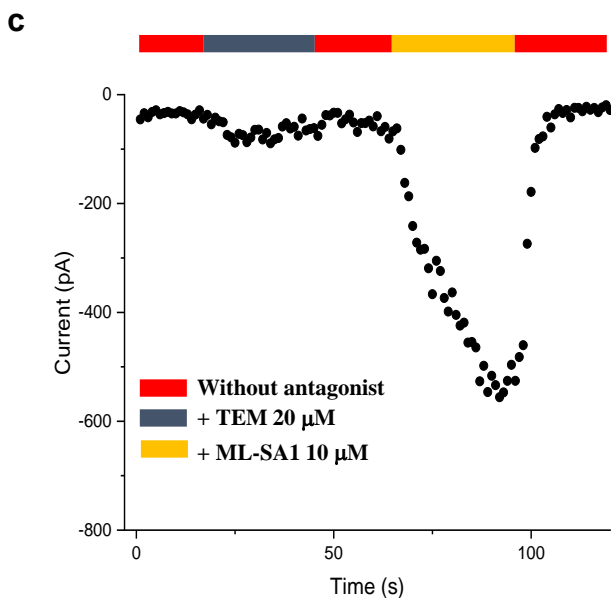

**Figure supplement 1: Time course plots of current amplitudes of Y404 mutations recorded at -140mV with symmetrical pH of 7.4.** (a) Time course plots of Y404W recorded using patch clamp in whole-cell configuration with (left) or without (right) 100 μM PI(3,5)P<sub>2</sub> in the pipette (cytosolic). Tem or agonist ML-SA1 was introduced in the bath solution (extracellular/luminal). (b) Time course plots of Y404W inhibition by antagonists ML-SI1 (left) and ML-SI3 (right) recorded using patch clamp in whole-cell configuration. The antagonists were introduced in the bath solution (extracellular/luminal). (c) Time course plots of Y404A with 100 μM PI(3,5)P<sub>2</sub> in the pipette (cytosolic). Tem or ML-SA1 was introduced in the bath solution (extracellular/luminal).

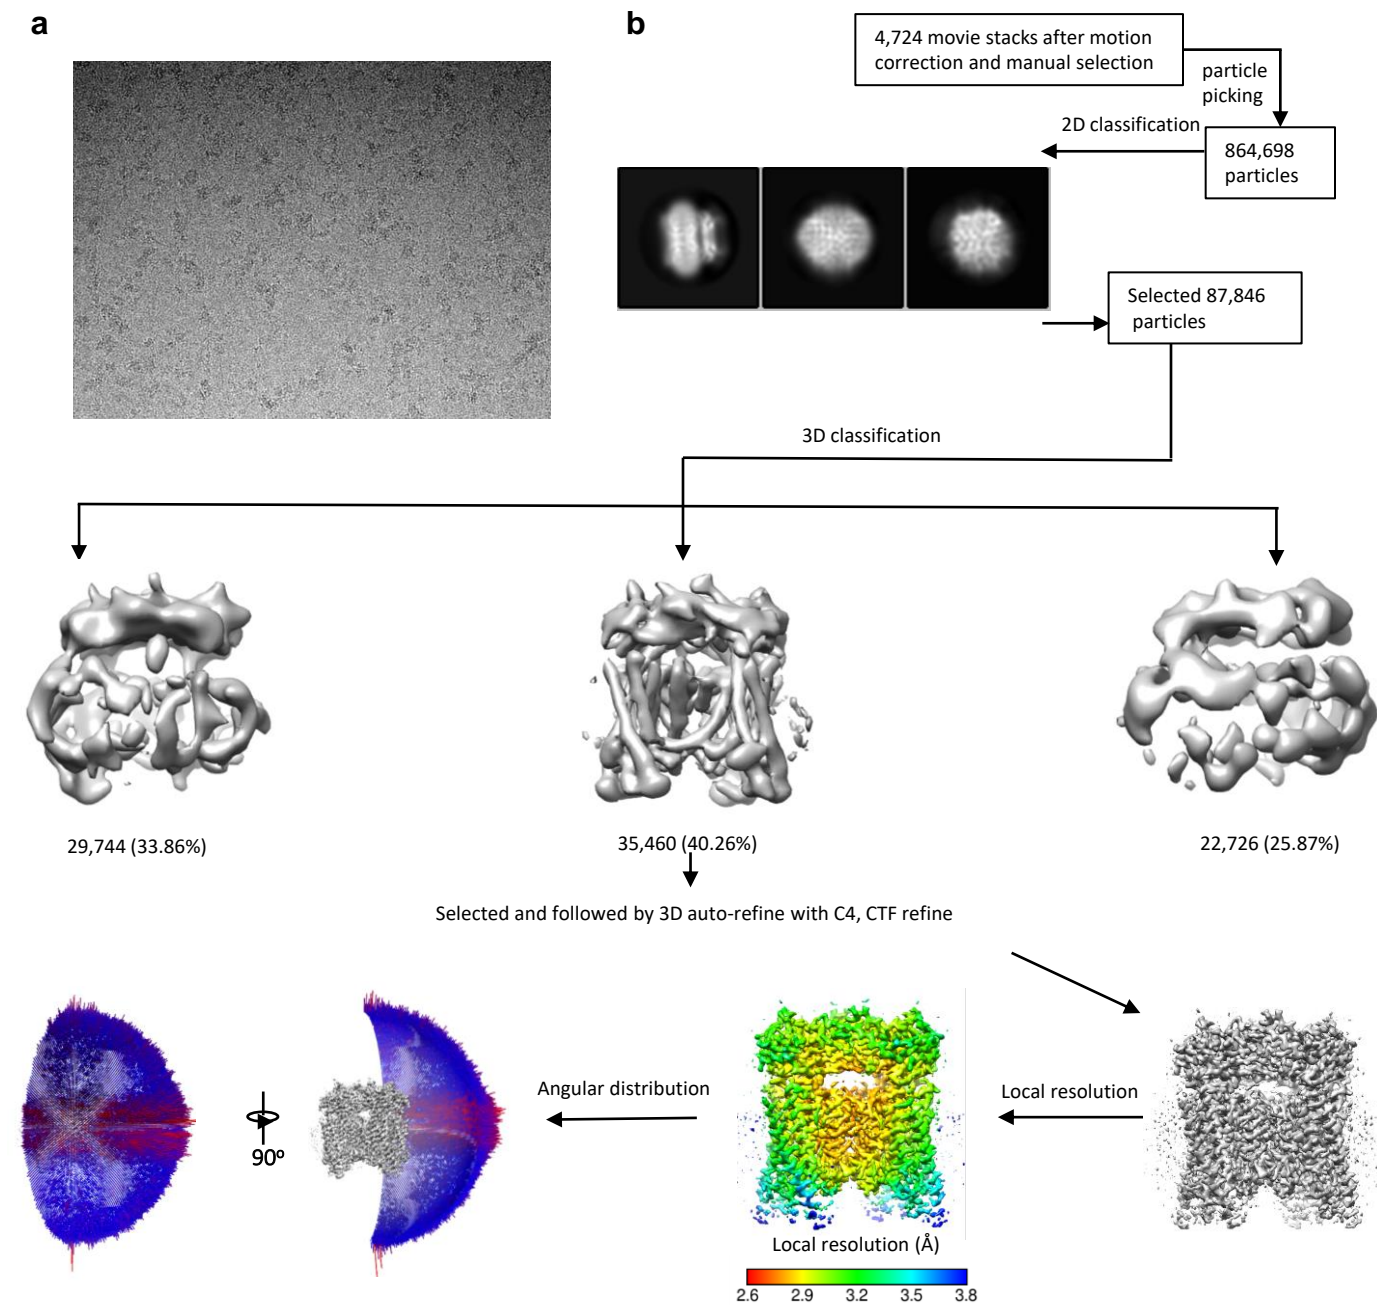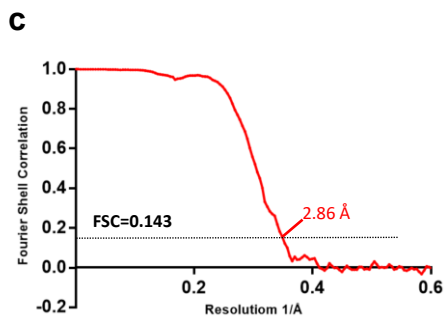

**Figure supplement 2: Cryo-EM data processing scheme of the TRPML1 Y404W.** (a) Representative micrograph. (b) Flow chart of the cryo-EM data processing procedure and the Euler angle distribution of particles used in the final three-dimensional reconstruction. Selected 2D class averages are shown. The final structure represent an open state. (c) Fourier Shell Correlation curves showing the overall resolution at FSC=0.143.

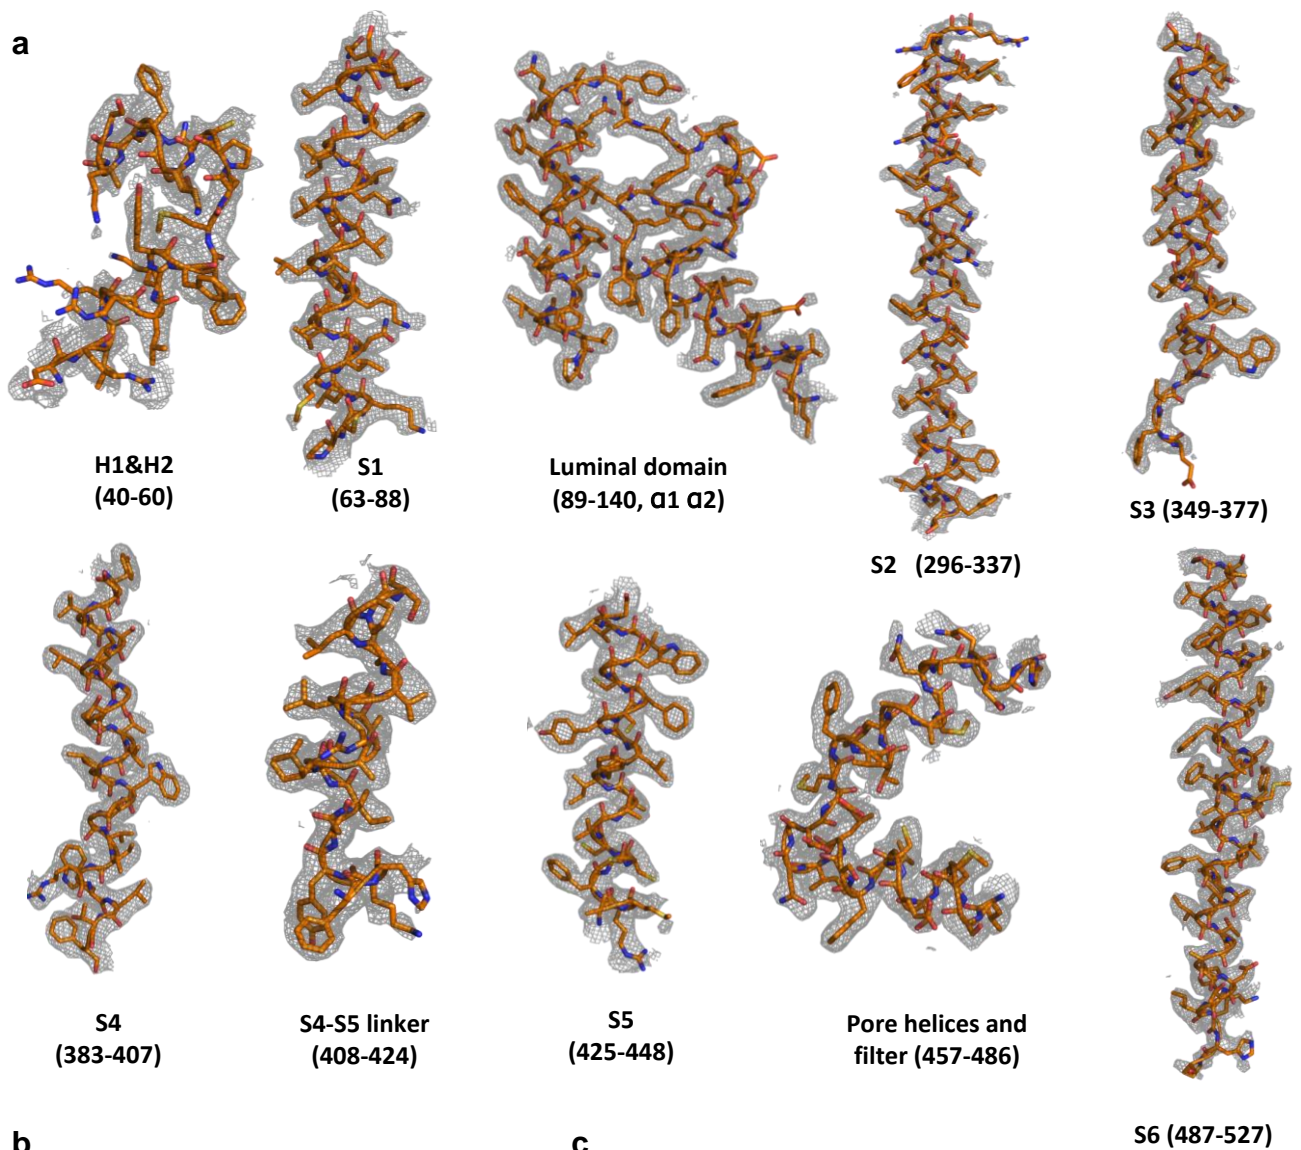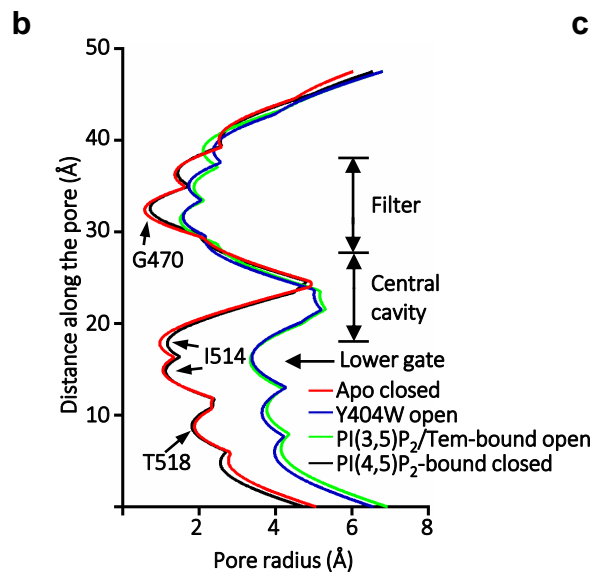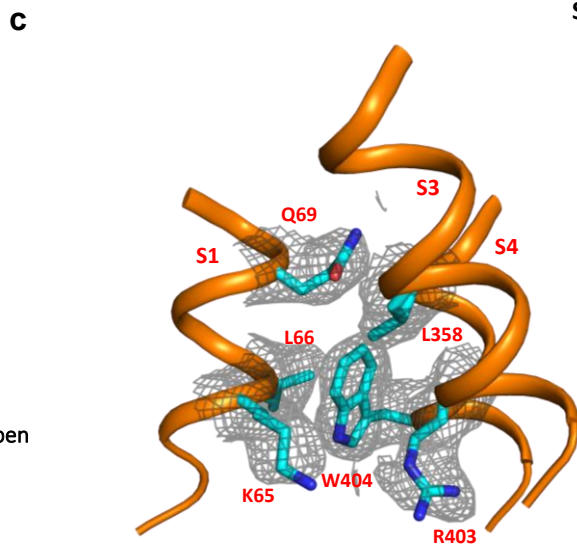

**Figure supplement 3: Sample density maps of Y404W and pore radius:** (a) Sample density maps of the Y404W open TRPML1 structure contoured at  $4\sigma$ . (b) Pore radius along the central axis in the open and closed states. PDB codes for apo closed and PI(3,5)P<sub>2</sub>/Tem-bound open are 7SQ8 and 7SQ9, respectively. (c) EM density map surrounding W404 region shown in grey mesh and contoured at  $4\sigma$ , key W404-interacting residues are shown in cyan. The local resolution of this region is 3.2 Å.

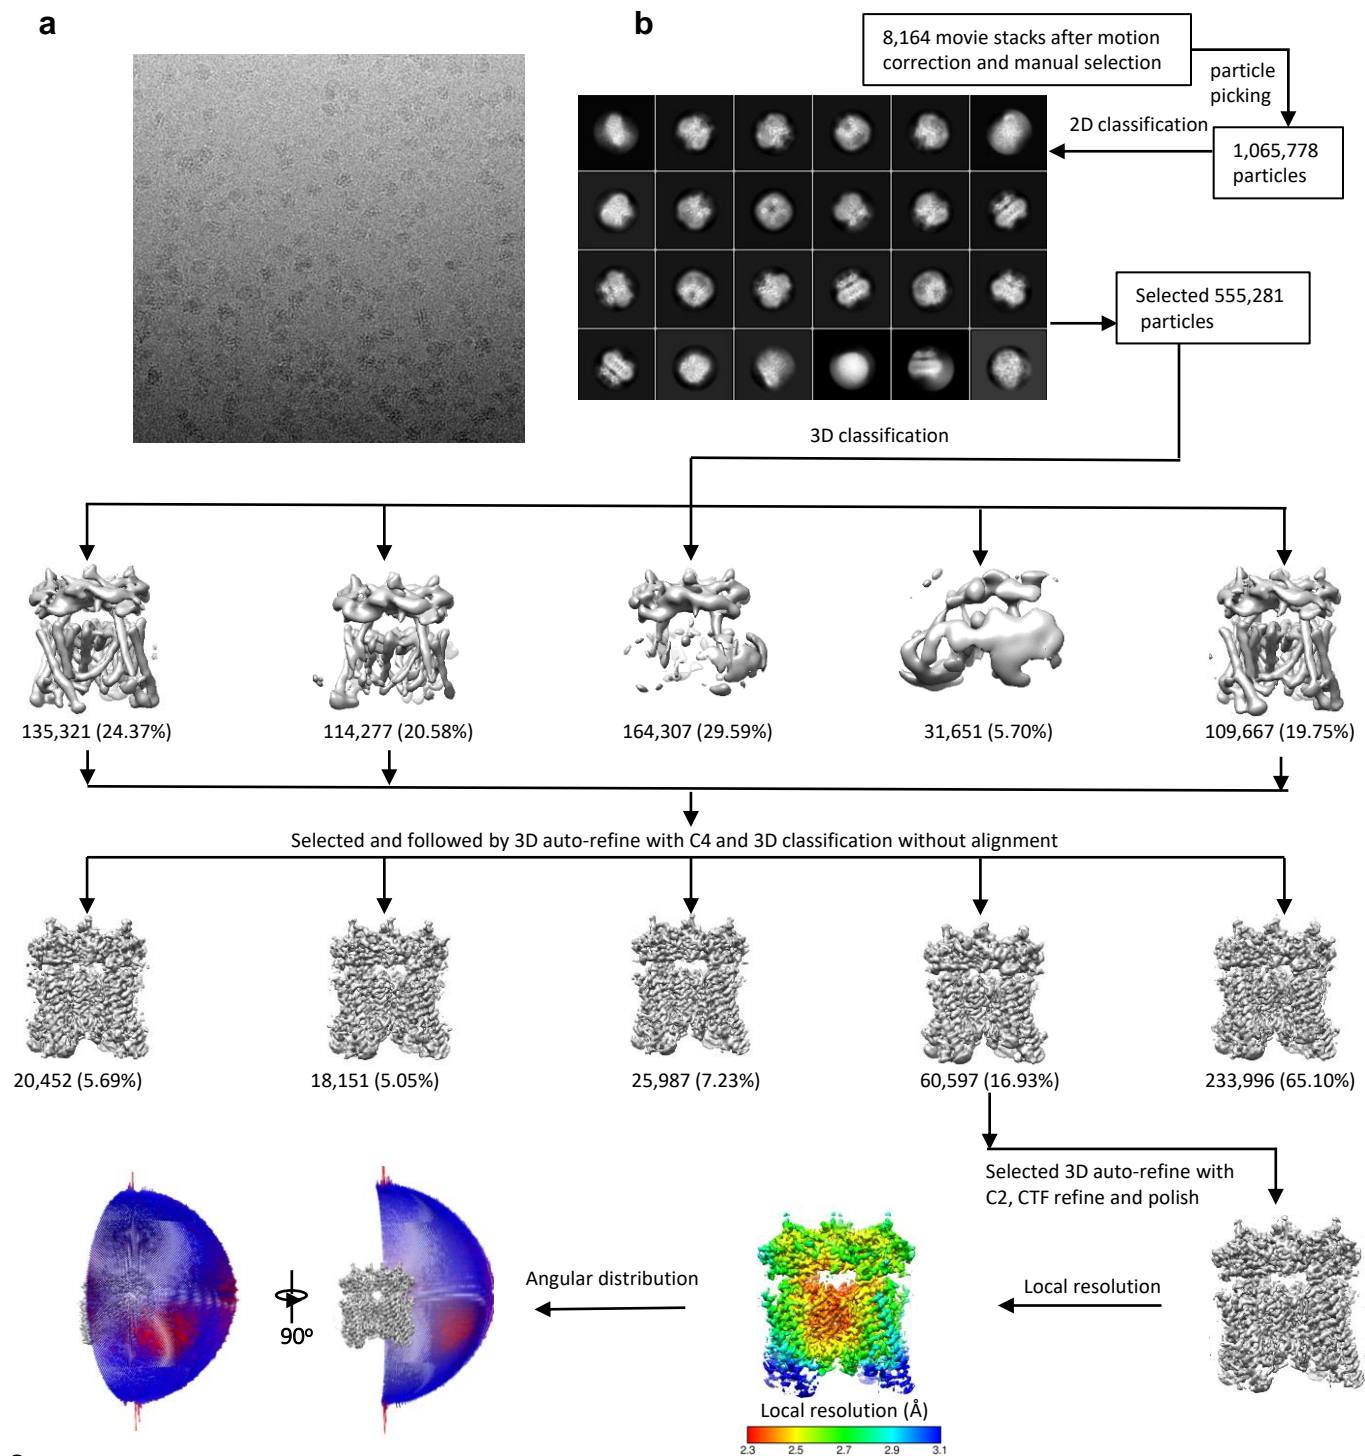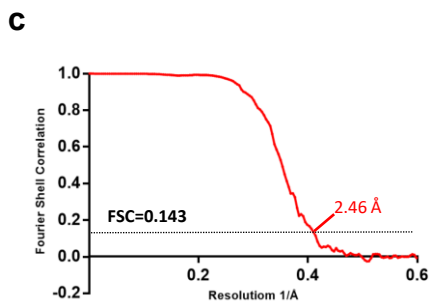

**Figure supplement 4: Cryo-EM data processing scheme of the TRPML1 sample prepared in the presence of PI(4,5)P<sub>2</sub>.** (a) Representative micrograph. (b) Flow chart of the cryo-EM data processing procedure and the Euler angle distribution of particles used in the final three-dimensional reconstruction. Selected 2D class averages are shown. The final structure represent an open state. (c) Fourier Shell Correlation curves showing the overall resolution at FSC=0.143.

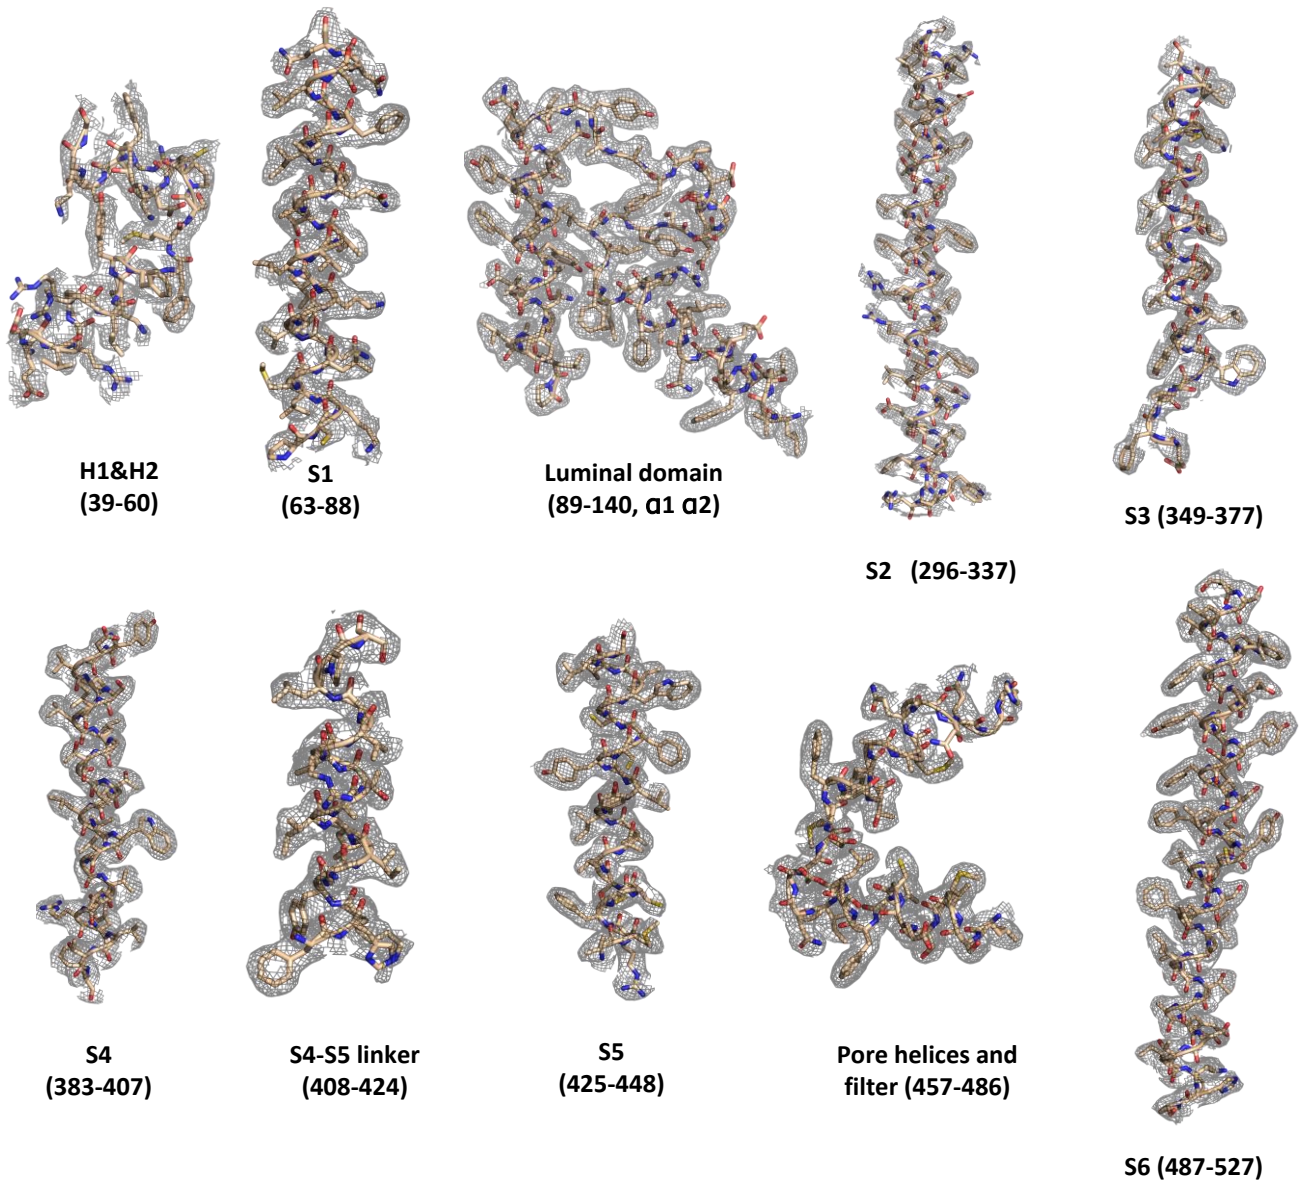

**Figure supplement 5** : Sample density maps of the PI(4,5)P<sub>2</sub>-bound closed TRPML1 structure contoured at 4  $\sigma$ .

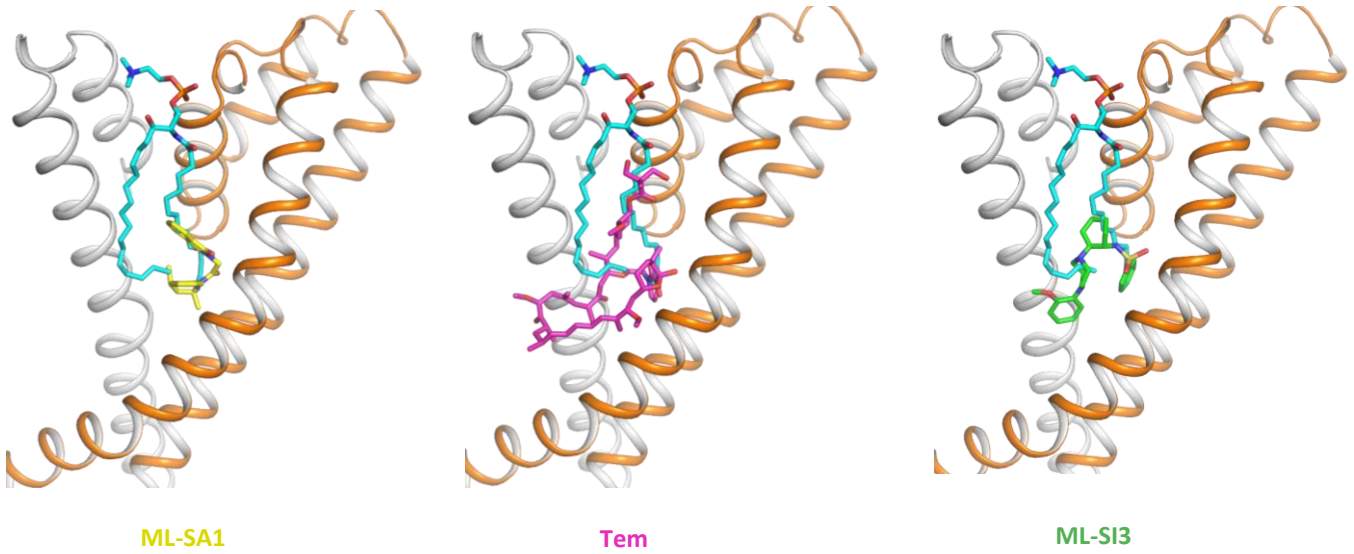

**Figure supplement 6:** Spingomyelin (cyan) binding overlaps with that of agonist ML-SA1 (yellow), rapamycin analog Tem (magenta), or antagonist ML-SI3 (green).

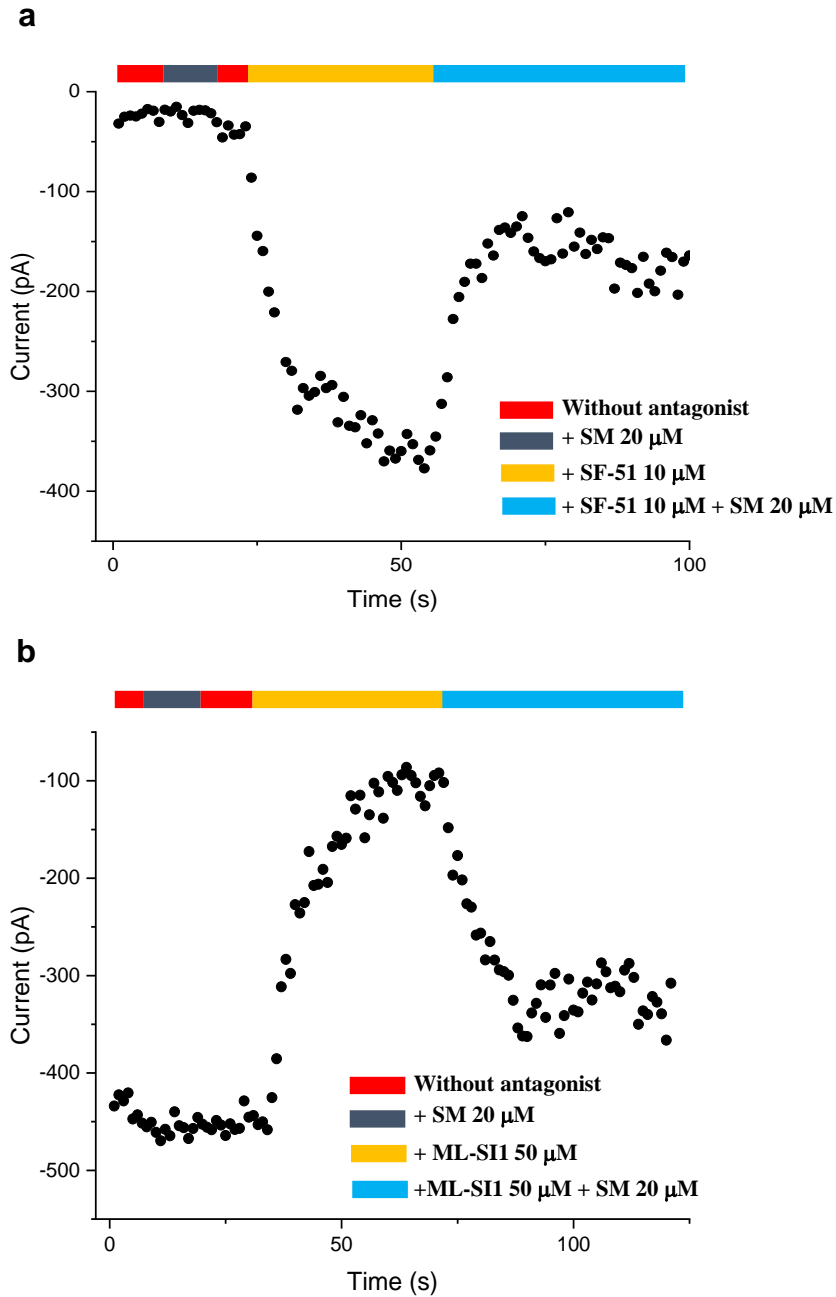

**Figure supplement 7: Time course plots of sphingomyelin affected TRPML1 current amplitudes.** (a) Sphingomyelin inhibition effect on SF-51-activated wild-type TRPML1. (b) SM activation effect on ML-SI1-inhibited Y404W mutant. Currents shown in (a) and (b) were recorded at -140mV using patch clamp in whole-cell configuration with pH 4.6 in the bath solution as the adverse effect of SM on agonist or antagonist is subtle and is measurable only at low luminal pH.

**Top View**

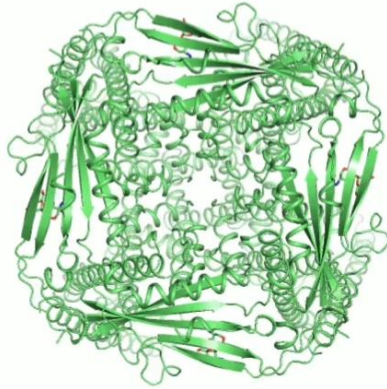

**Movie supplement 1. Conformational changes between open and closed TRPML1**
